# Supplementary material
Source: publisher figshare collection journal article supplement (https://diabetesjournals.figshare.com/ndownloader/files/34172046)
Supplement: Supplementary file 1 [file 34172046]

## Supplemental Material

### *Regional intra-pancreatic fat deposition according to fasting insulin*

#### Head

Fasting insulin explained 4.5% of the variance in pancreatic head fat. In the model 1 analyses, the head region of the pancreas had significant differences in fat % when comparing both tertile 2 with tertile 1 ( $\beta = 0.933$ ,  $p = 0.008$ ) and tertile 3 with tertile 1 ( $\beta = 1.305$ ,  $p < 0.001$ ). In the model 2 analyses, the head region of the pancreas had significant differences in fat % when comparing both tertile 2 with tertile 1 ( $\beta = 0.819$ ,  $p = 0.011$ ) and tertile 3 with tertile 1 ( $\beta = 1.100$ ,  $p = 0.001$ ). In the model 3 and model 4 analyses, the head region of the pancreas had no significant differences in fat % when comparing the fasting insulin tertiles (Table 3). The use of antidiabetic medications did not materially influence the results (Supplementary Table 3).

#### Body

Fasting insulin explained 6.5% of the variance in pancreatic body fat. In the model 1 analyses, the body region of the pancreas had significant differences in fat % when comparing both tertile 2 with tertile 1 ( $\beta = 1.154$ ,  $p = 0.001$ ) and tertile 3 with tertile 1 ( $\beta = 1.534$ ,  $p < 0.001$ ). In the model 2 analyses, the body region of the pancreas had significant differences in fat % when comparing both tertile 2 with tertile 1 ( $\beta = 1.118$ ,  $p = 0.001$ ) and tertile 3 with tertile 1 ( $\beta = 1.463$ ,  $p < 0.001$ ). In the model 3 analyses, the body region of the pancreas had significant differences in fat % when comparing both tertile 2 with tertile 1 ( $\beta = 0.706$ ,  $p = 0.019$ ) and tertile 3 with tertile 1 ( $\beta = 0.628$ ,  $p = 0.046$ ). In the model 4 analyses, the body region of the pancreas had significant difference in fat % when comparing tertile 2 with tertile 1 ( $\beta = 0.702$ ,  $p = 0.023$ ), however when comparing tertile 3 with tertile 1 the difference was not statistically significant (Table 3). When stratifying the data for antidiabetic medication use, the models 1-4 analyses were statistically significant only in the participants who did not use antidiabetic medications (Supplementary Table 3).

## Tail

Fasting insulin explained 5.4% of the variance in pancreatic tail fat. In the model 1 analyses, the tail region of the pancreas had significant differences in fat % when comparing both tertile 2 with tertile 1 ( $\beta = 1.122$ ,  $p = 0.001$ ) and tertile 3 with tertile 1 ( $\beta = 1.334$ ,  $p < 0.001$ ). In the model 2 analyses, the tail region of the pancreas had significant differences in fat % when comparing both tertile 2 with tertile 1 ( $\beta = 1.095$ ,  $p < 0.001$ ) and tertile 3 with tertile 1 ( $\beta = 1.270$ ,  $p < 0.001$ ). In the model 3 analyses, the tail region of the pancreas had significant difference in fat % when comparing tertile 2 with tertile 1 ( $\beta = 0.768$ ,  $p = 0.009$ ). When comparing tertile 3 with tertile 1, the difference just missed the predetermined level of statistical significance ( $p = 0.058$ ). In the model 4 analyses, the tail region of the pancreas had significant difference in % when comparing tertile 2 with tertile 1 ( $\beta = 0.709$ ,  $p = 0.019$ ), however when comparing tertile 3 with tertile 1 the difference was not statistically significant (Table 3). When stratifying the data for antidiabetic medication use, the models 1-4 analyses were statistically significant only in the participants who did not use antidiabetic medications (Supplementary Table 3).

**Supplementary Table 1.** Associations of the studied covariates with intra-pancreatic fat deposition

| Region | Age     |                  | Sex     |                  | Asians vs.<br>European<br>Caucasians |       | BMI     |                  | Liver fat |                  |
|--------|---------|------------------|---------|------------------|--------------------------------------|-------|---------|------------------|-----------|------------------|
|        | $\beta$ | $p$              | $\beta$ | $p$              | $\beta$                              | $p$   | $\beta$ | $p$              | $\beta$   | $p$              |
| Total  | 0.056   | <b>&lt;0.001</b> | -1.150  | <b>&lt;0.001</b> | -0.085                               | 0.736 | 0.199   | <b>&lt;0.001</b> | 0.056     | <b>&lt;0.001</b> |
| Head   | 0.063   | <b>&lt;0.001</b> | -1.433  | <b>&lt;0.001</b> | -0.223                               | 0.457 | 0.232   | <b>&lt;0.001</b> | 0.067     | <b>&lt;0.001</b> |
| Body   | 0.057   | <b>&lt;0.001</b> | -1.026  | <b>&lt;0.001</b> | -0.111                               | 0.709 | 0.230   | <b>&lt;0.001</b> | 0.064     | <b>&lt;0.001</b> |
| Tail   | 0.062   | <b>&lt;0.001</b> | -0.895  | <b>&lt;0.001</b> | 0.031                                | 0.914 | 0.189   | <b>&lt;0.001</b> | 0.053     | <b>&lt;0.001</b> |

Footnotes: Data are presented as  $\beta$  coefficients and  $p$  values from linear regression analysis. Statistically significant values ( $p < 0.05$ ) are in bold.

**Supplementary Table 2.** Influence of antidiabetic medications use on the associations between regional intra-pancreatic fat deposition and diabetes status

| Model                       | Head                           |       |                  |                             |       |              | Body                           |       |                  |                             |       |              | Tail                           |       |                  |                             |       |              |
|-----------------------------|--------------------------------|-------|------------------|-----------------------------|-------|--------------|--------------------------------|-------|------------------|-----------------------------|-------|--------------|--------------------------------|-------|------------------|-----------------------------|-------|--------------|
|                             | Prediabetes vs. Normoglycaemia |       |                  | Diabetes vs. Normoglycaemia |       |              | Prediabetes vs. Normoglycaemia |       |                  | Diabetes vs. Normoglycaemia |       |              | Prediabetes vs. Normoglycaemia |       |                  | Diabetes vs. Normoglycaemia |       |              |
|                             | $\beta$                        | S.E.  | <i>p</i>         | $\beta$                     | S.E.  | <i>p</i>     | $\beta$                        | S.E.  | <i>p</i>         | $\beta$                     | S.E.  | <i>p</i>     | $\beta$                        | S.E.  | <i>p</i>         | $\beta$                     | S.E.  | <i>p</i>     |
| No antidiabetic medications |                                |       |                  |                             |       |              |                                |       |                  |                             |       |              |                                |       |                  |                             |       |              |
| Model 1                     | 1.238                          | 0.298 | <b>&lt;0.001</b> | 1.092                       | 0.518 | <b>0.036</b> | 1.246                          | 0.291 | <b>&lt;0.001</b> | 1.551                       | 0.506 | <b>0.002</b> | 1.256                          | 0.285 | <b>&lt;0.001</b> | 1.501                       | 0.495 | <b>0.003</b> |
| Model 2                     | 0.538                          | 0.294 | 0.068            | -0.107                      | 0.512 | 0.835        | 0.702                          | 0.296 | <b>0.018</b>     | 0.597                       | 0.516 | 0.248        | 0.654                          | 0.282 | <b>0.021</b>     | 0.372                       | 0.492 | 0.450        |
| Model 3                     | 0.062                          | 0.266 | 0.816            | -0.684                      | 0.458 | 0.137        | 0.218                          | 0.271 | 0.422            | 0.010                       | 0.466 | 0.982        | 0.266                          | 0.264 | 0.315            | -0.098                      | 0.455 | 0.829        |
| Model 4                     | 0.003                          | 0.270 | 0.992            | -0.748                      | 0.458 | 0.103        | 0.132                          | 0.276 | 0.632            | -0.048                      | 0.468 | 0.918        | 0.214                          | 0.271 | 0.431            | -0.126                      | 0.460 | 0.784        |
| Antidiabetic medications    |                                |       |                  |                             |       |              |                                |       |                  |                             |       |              |                                |       |                  |                             |       |              |
| Model 1                     | 0.627                          | 1.123 | 0.581            | 0.259                       | 0.753 | 0.734        | 0.023                          | 1.217 | 0.985            | -0.477                      | 0.816 | 0.563        | 1.184                          | 0.845 | 0.172            | -0.047                      | 0.567 | 0.934        |
| Model 2                     | 0.366                          | 0.969 | 0.709            | -0.439                      | 0.869 | 0.618        | -0.627                         | 1.158 | 0.593            | -1.778                      | 1.038 | 0.100        | 0.843                          | 0.870 | 0.343            | -1.081                      | 0.780 | 0.179        |
| Model 3                     | 0.170                          | 0.932 | 0.857            | -0.498                      | 0.831 | 0.555        | -0.912                         | 1.073 | 0.404            | -1.863                      | 0.957 | 0.064        | 0.724                          | 0.869 | 0.413            | -1.117                      | 0.774 | 0.163        |
| Model 4                     | -1.225                         | 1.349 | 0.378            | -0.717                      | 1.034 | 0.499        | -1.859                         | 1.735 | 0.301            | -2.744                      | 1.329 | 0.057        | -0.099                         | 1.436 | 0.946            | -1.250                      | 1.101 | 0.274        |

Footnotes: Data are presented as  $\beta$  coefficients, standard errors (S.E.), and *p* values from linear regression analysis. Statistically significant values (*p* < 0.05) are in bold. Model 1: unadjusted model; Model 2: adjusted for age, sex, ethnicity; Model 3: adjusted for age, sex, ethnicity, and BMI; Model 4: adjusted for age, sex, ethnicity, BMI, and liver fat.

**Supplementary Table 3.** Influence of antidiabetic medications use on the associations between regional intra-pancreatic fat deposition and insulin traits

| Trait/Model     |                             | Head                    |       |              |                         |       |                  | Body                    |       |              |                         |       |                  | Tail                    |       |              |                         |       |                  |
|-----------------|-----------------------------|-------------------------|-------|--------------|-------------------------|-------|------------------|-------------------------|-------|--------------|-------------------------|-------|------------------|-------------------------|-------|--------------|-------------------------|-------|------------------|
|                 |                             | Tertile 2 vs. Tertile 1 |       |              | Tertile 3 vs. Tertile 1 |       |                  | Tertile 2 vs. Tertile 1 |       |              | Tertile 3 vs. Tertile 1 |       |                  | Tertile 2 vs. Tertile 1 |       |              | Tertile 3 vs. Tertile 1 |       |                  |
|                 |                             | $\beta$                 | S.E.  | <i>p</i>     | $\beta$                 | S.E.  | <i>p</i>         | $\beta$                 | S.E.  | <i>p</i>     | $\beta$                 | S.E.  | <i>p</i>         | $\beta$                 | S.E.  | <i>p</i>     | $\beta$                 | S.E.  | <i>p</i>         |
| HOMA-IR         | No antidiabetic medications |                         |       |              |                         |       |                  |                         |       |              |                         |       |                  |                         |       |              |                         |       |                  |
|                 | Model 1                     | 0.765                   | 0.376 | <b>0.043</b> | 1.389                   | 0.375 | <b>&lt;0.001</b> | 1.224                   | 0.368 | <b>0.001</b> | 1.683                   | 0.367 | <b>&lt;0.001</b> | 1.168                   | 0.363 | <b>0.001</b> | 1.470                   | 0.362 | <b>&lt;0.001</b> |
|                 | Model 2                     | 0.634                   | 0.346 | 0.068        | 1.261                   | 0.347 | <b>&lt;0.001</b> | 1.153                   | 0.345 | <b>0.001</b> | 1.653                   | 0.347 | <b>&lt;0.001</b> | 1.092                   | 0.330 | <b>0.001</b> | 1.437                   | 0.331 | <b>&lt;0.001</b> |
|                 | Model 3                     | 0.285                   | 0.317 | 0.370        | 0.513                   | 0.329 | 0.120            | 0.770                   | 0.316 | <b>0.015</b> | 0.861                   | 0.328 | <b>0.009</b>     | 0.803                   | 0.309 | <b>0.010</b> | 0.808                   | 0.322 | <b>0.013</b>     |
|                 | Model 4                     | 0.259                   | 0.321 | 0.420        | 0.395                   | 0.334 | 0.238            | 0.819                   | 0.321 | <b>0.011</b> | 0.835                   | 0.333 | <b>0.013</b>     | 0.813                   | 0.316 | <b>0.011</b> | 0.804                   | 0.328 | <b>0.015</b>     |
|                 | Antidiabetic medications    |                         |       |              |                         |       |                  |                         |       |              |                         |       |                  |                         |       |              |                         |       |                  |
|                 | Model 1                     | 0.300                   | 0.985 | 0.764        | 1.286                   | 0.985 | 0.208            | -0.086                  | 1.032 | 0.935        | -0.186                  | 1.032 | 0.859            | 0.414                   | 0.749 | 0.587        | -0.386                  | 0.749 | 0.613            |
|                 | Model 2                     | -0.665                  | 0.685 | 0.348        | 0.714                   | 0.684 | 0.314            | -0.744                  | 1.056 | 0.493        | -0.452                  | 1.056 | 0.675            | 0.107                   | 0.831 | 0.899        | -0.759                  | 0.831 | 0.376            |
|                 | Model 3                     | -0.603                  | 0.707 | 0.409        | 0.858                   | 0.736 | 0.264            | -0.837                  | 1.091 | 0.456        | -0.671                  | 1.135 | 0.564            | 0.116                   | 0.871 | 0.896        | -0.738                  | 0.906 | 0.430            |
|                 | Model 4                     | -0.861                  | 0.815 | 0.339        | 0.931                   | 0.838 | 0.317            | -1.490                  | 2.269 | 0.540        | -1.090                  | 2.331 | 0.660            | -1.243                  | 1.291 | 0.380        | -1.632                  | 1.326 | 0.273            |
| HOMA- $\beta$   | No antidiabetic medications |                         |       |              |                         |       |                  |                         |       |              |                         |       |                  |                         |       |              |                         |       |                  |
|                 | Model 1                     | 0.095                   | 0.384 | 0.805        | -0.224                  | 0.383 | 0.559            | 0.226                   | 0.382 | 0.554        | 0.099                   | 0.381 | 0.796            | 0.094                   | 0.374 | 0.802        | -0.135                  | 0.373 | 0.717            |
|                 | Model 2                     | 0.514                   | 0.357 | 0.151        | 0.352                   | 0.360 | 0.330            | 0.647                   | 0.361 | 0.075        | 0.687                   | 0.365 | 0.061            | 0.563                   | 0.344 | 0.103        | 0.538                   | 0.347 | 0.123            |
|                 | Model 3                     | 0.182                   | 0.320 | 0.570        | -0.170                  | 0.327 | 0.602            | 0.281                   | 0.322 | 0.383        | 0.120                   | 0.329 | 0.717            | 0.277                   | 0.316 | 0.382        | 0.086                   | 0.323 | 0.791            |
|                 | Model 4                     | 0.092                   | 0.325 | 0.778        | -0.264                  | 0.330 | 0.425            | 0.261                   | 0.329 | 0.428        | 0.112                   | 0.334 | 0.739            | 0.261                   | 0.324 | 0.421        | 0.095                   | 0.329 | 0.772            |
|                 | Antidiabetic medications    |                         |       |              |                         |       |                  |                         |       |              |                         |       |                  |                         |       |              |                         |       |                  |
|                 | Model 1                     | -1.843                  | 0.939 | 0.065        | -0.986                  | 0.939 | 0.308            | -1.743                  | 0.927 | 0.077        | -0.157                  | 0.927 | 0.867            | -1.714                  | 0.644 | <b>0.016</b> | -0.357                  | 0.644 | 0.586            |
|                 | Model 2                     | -0.874                  | 0.800 | 0.293        | -0.004                  | 0.755 | 0.996            | -1.701                  | 0.972 | 0.102        | 0.725                   | 0.917 | 0.442            | -1.927                  | 0.740 | <b>0.021</b> | 0.052                   | 0.698 | 0.942            |
|                 | Model 3                     | -0.865                  | 0.876 | 0.341        | 0.007                   | 0.849 | 0.994            | -1.931                  | 1.045 | 0.087        | 0.456                   | 1.012 | 0.659            | -1.921                  | 0.810 | <b>0.034</b> | 0.059                   | 0.784 | 0.941            |
|                 | Model 4                     | -0.154                  | 1.220 | 0.904        | 0.319                   | 1.354 | 0.823            | 0.088                   | 1.591 | 0.958        | 2.268                   | 1.766 | 0.255            | -1.927                  | 0.738 | <b>0.048</b> | -0.363                  | 0.819 | 0.676            |
| Fasting insulin | No antidiabetic medications |                         |       |              |                         |       |                  |                         |       |              |                         |       |                  |                         |       |              |                         |       |                  |
|                 | Model 1                     | 0.735                   | 0.366 | <b>0.046</b> | 1.369                   | 0.365 | <b>&lt;0.001</b> | 1.006                   | 0.360 | <b>0.006</b> | 1.599                   | 0.359 | <b>&lt;0.001</b> | 0.908                   | 0.356 | <b>0.011</b> | 1.356                   | 0.355 | <b>&lt;0.001</b> |
|                 | Model 2                     | 0.703                   | 0.338 | <b>0.038</b> | 1.250                   | 0.339 | <b>&lt;0.001</b> | 1.047                   | 0.338 | <b>0.002</b> | 1.586                   | 0.339 | <b>&lt;0.001</b> | 0.976                   | 0.323 | <b>0.003</b> | 1.354                   | 0.324 | <b>&lt;0.001</b> |
|                 | Model 3                     | 0.409                   | 0.308 | 0.185        | 0.523                   | 0.320 | 0.104            | 0.730                   | 0.308 | <b>0.019</b> | 0.831                   | 0.321 | <b>0.010</b>     | 0.730                   | 0.301 | <b>0.016</b> | 0.737                   | 0.314 | <b>0.019</b>     |
|                 | Model 4                     | 0.392                   | 0.312 | 0.210        | 0.412                   | 0.324 | 0.205            | 0.778                   | 0.313 | <b>0.014</b> | 0.812                   | 0.326 | <b>0.013</b>     | 0.739                   | 0.307 | <b>0.017</b> | 0.736                   | 0.320 | <b>0.022</b>     |
|                 | Antidiabetic medications    |                         |       |              |                         |       |                  |                         |       |              |                         |       |                  |                         |       |              |                         |       |                  |
|                 | Model 1                     | -0.114                  | 1.010 | 0.911        | 0.757                   | 1.010 | 0.463            | 0.343                   | 1.029 | 0.743        | 0.243                   | 1.029 | 0.816            | -0.286                  | 0.769 | 0.714        | -0.286                  | 0.769 | 0.714            |
|                 | Model 2                     | -0.817                  | 0.702 | 0.264        | 0.715                   | 0.648 | 0.289            | 0.000                   | 1.140 | 1.000        | 0.265                   | 1.053 | 0.805            | -0.610                  | 0.909 | 0.513        | -0.448                  | 0.840 | 0.602            |
|                 | Model 3                     | -0.722                  | 0.724 | 0.337        | 0.906                   | 0.706 | 0.222            | -0.084                  | 1.194 | 0.945        | 0.097                   | 1.164 | 0.935            | -0.577                  | 0.956 | 0.557        | -0.383                  | 0.932 | 0.688            |
|                 | Model 4                     | 0.542                   | 0.766 | 0.510        | 2.241                   | 0.898 | 0.055            | 0.975                   | 1.931 | 0.635        | 1.309                   | 2.265 | 0.588            | -1.618                  | 1.009 | 0.170        | -1.524                  | 1.183 | 0.254            |

Footnotes: Data are presented as  $\beta$  coefficients, standard errors (S.E.), and  $p$  values from linear regression analysis. Statistically significant values ( $p < 0.05$ ) are in bold. Model 1: unadjusted model; Model 2: adjusted for age, sex, ethnicity; Model 3: adjusted for age, sex, ethnicity, and BMI; Model 4: adjusted for age, sex, ethnicity, BMI, and liver fat.

Abbreviations: HOMA-IR: homeostatic model assessment of insulin resistance; HOMA- $\beta$ : homeostasis model assessment of  $\beta$ -cell function.
